# Supplementary material
Source: PubMed Central journal article supplement (PMC9015193)
Supplement: NIHMS1736268-supplement-2.pdf [file NIHMS1736268-supplement-2.pdf]

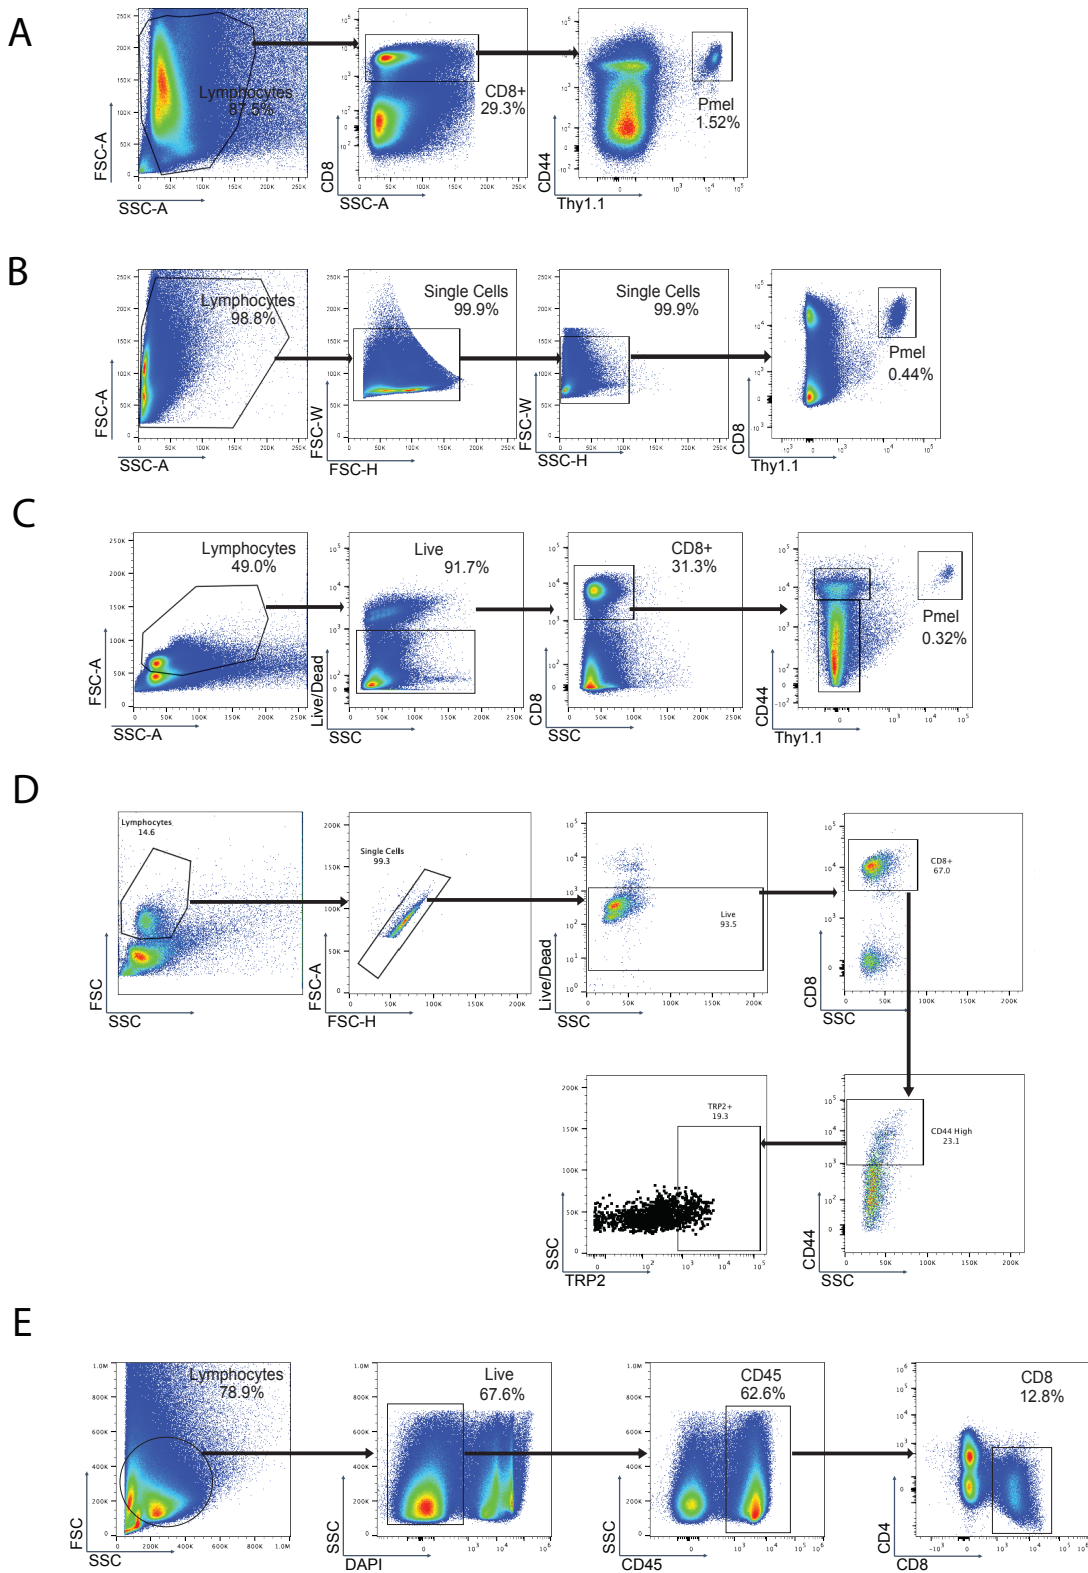

**Figure S1. Flow cytometry and FACS gating strategies, Related to STAR Methods.** (A) Gating for flow cytometry analyses shown in Figures 1 and 2. (B) Gating for pmel cell FACS sorting for RNaseq and scRNaseq shown in Figures 1 and 3. (C) Gating for characterization of LN  $T_{RM}$  shown in Figure 4. (D) Gating for tetramer staining and phenotyping shown in Figure 5. (E) Gating for CD8 T cell sorting of human T cells for scRNA-seq shown in Figure 7.

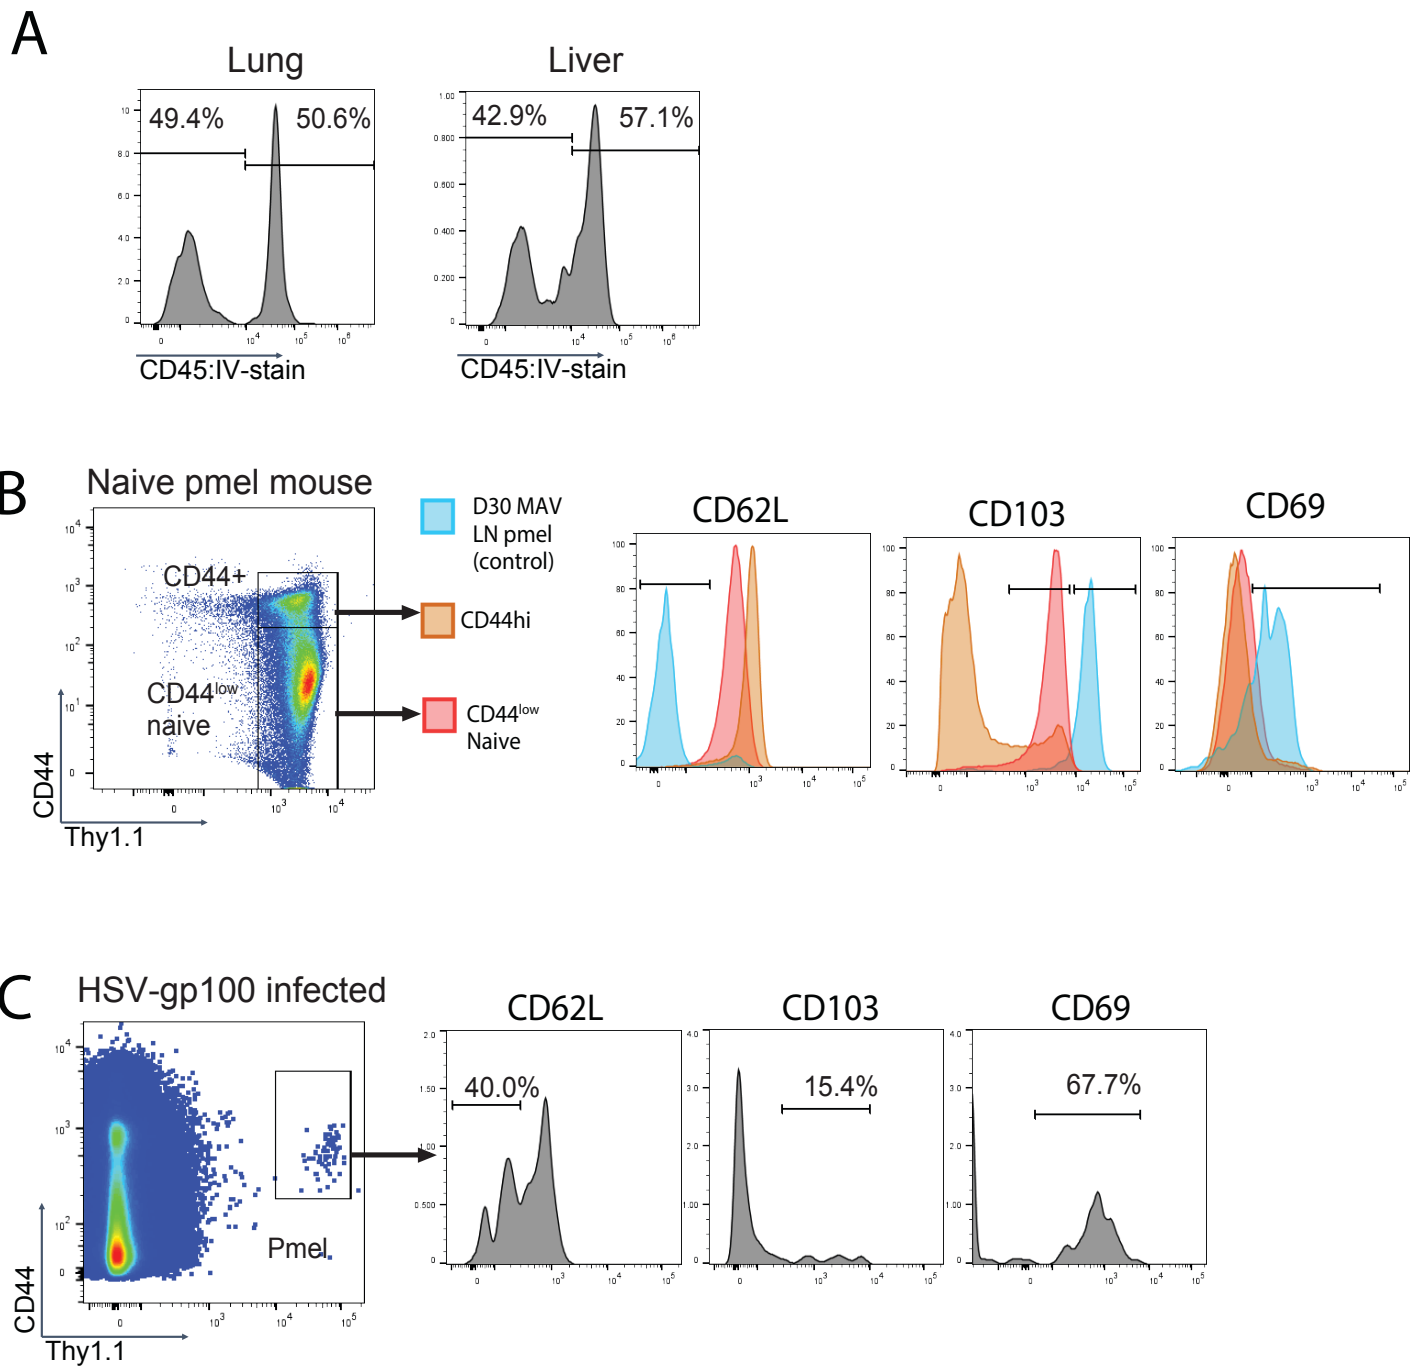

**Figure S2. Staining controls for pmel populations, Related to Figure 1.** (A) Mice with MAV underwent *in vivo*, intravenous staining with anti-CD45 mAb, to differentiate parenchymal vs. perivascular pmel subpopulations in lungs and liver. Histograms are gated on live, CD8<sup>+</sup>Thy1.1<sup>+</sup> pmel cells in perfused tissue (stained populations are considered perivascular). Data are representative of two experiments each involving n=5 mice. (B) T cells from a naïve pmel mouse were phenotyped; dot plot is gated on live CD8<sup>+</sup> cells from inguinal LNs. Phenotypes of CD44<sup>hi</sup> (orange) and CD44<sup>lo</sup> (red) pmel subsets are shown relative to that of Trm pmel cells from inguinal LNs of a mouse with MAV (blue), for comparison. The experiment was performed twice with similar results. (C) C57BL/6 mice received 10<sup>4</sup> pmel cells, followed by i.p. infection with 4x10<sup>5</sup> PFU HSV expressing human gp100. Inguinal LNs were harvested 30 d later and stained for Thy1.1<sup>+</sup> pmel cells and the indicated phenotypic markers. Representative dot plot is gated on live CD8<sup>+</sup> cells, and histograms are gated on CD44<sup>+</sup>Thy1.1<sup>+</sup> pmel cells, as shown. The experiment was performed twice with similar results.

# Skin

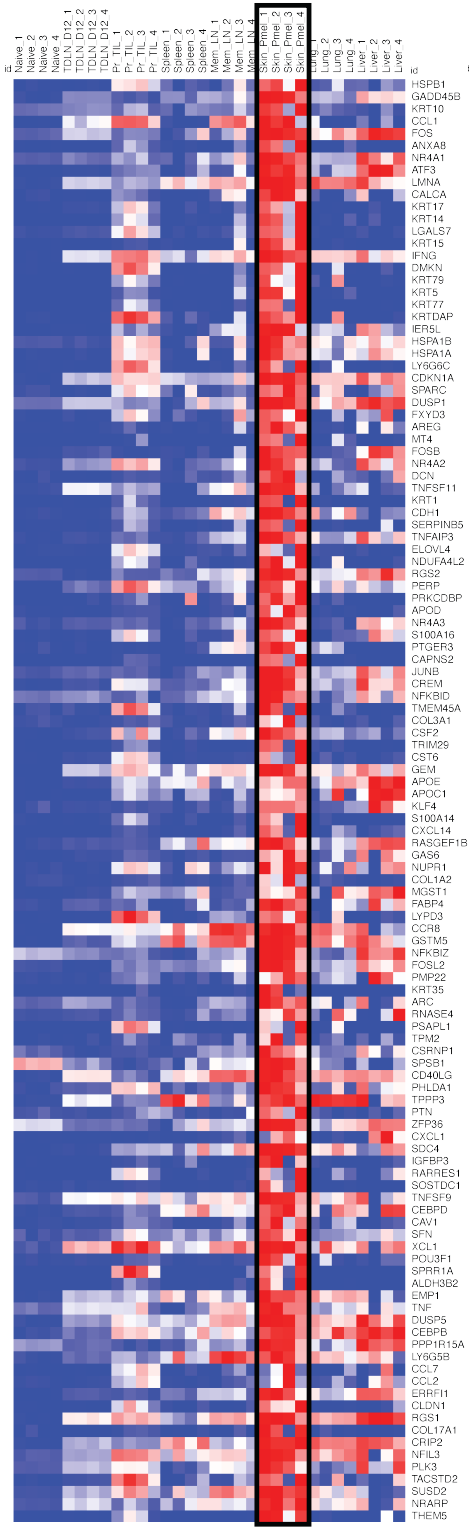

# Liver

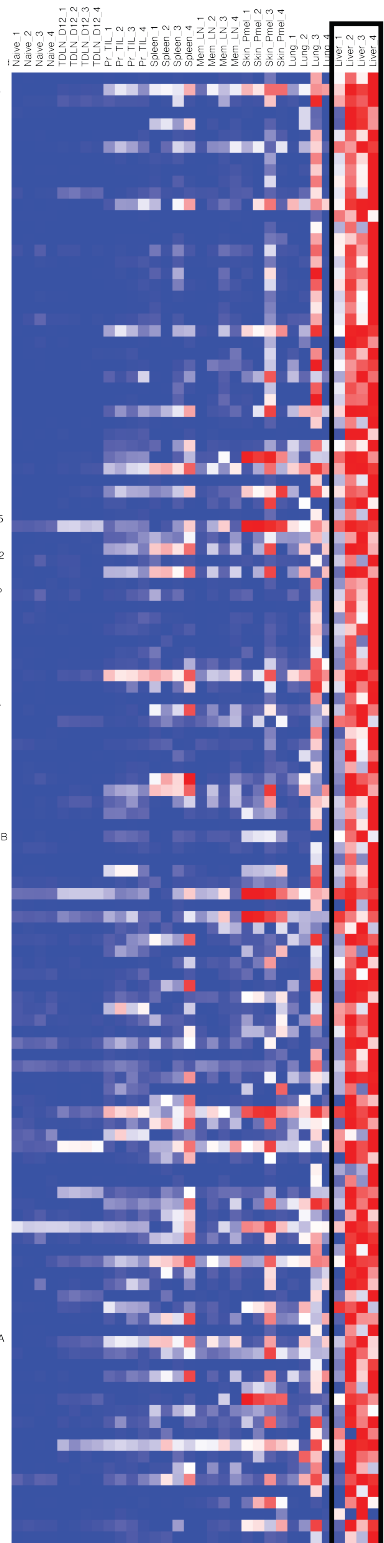

# Lung

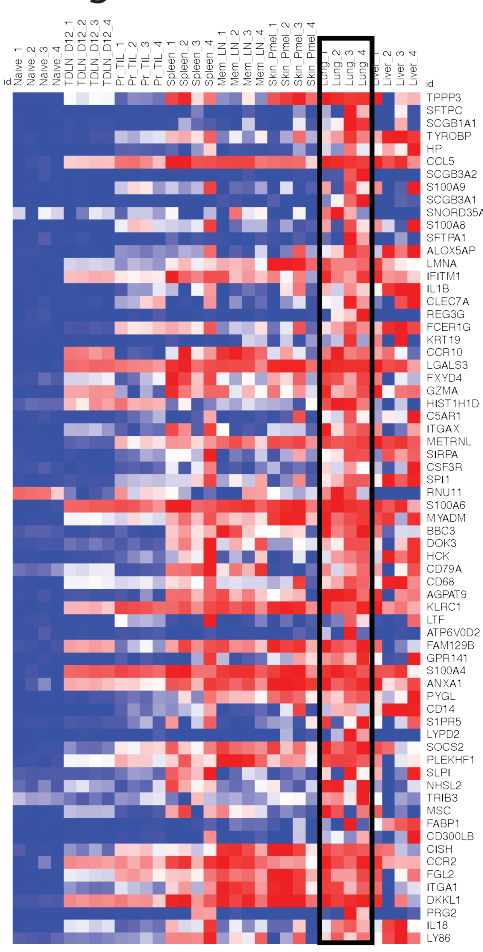

# Lymph node

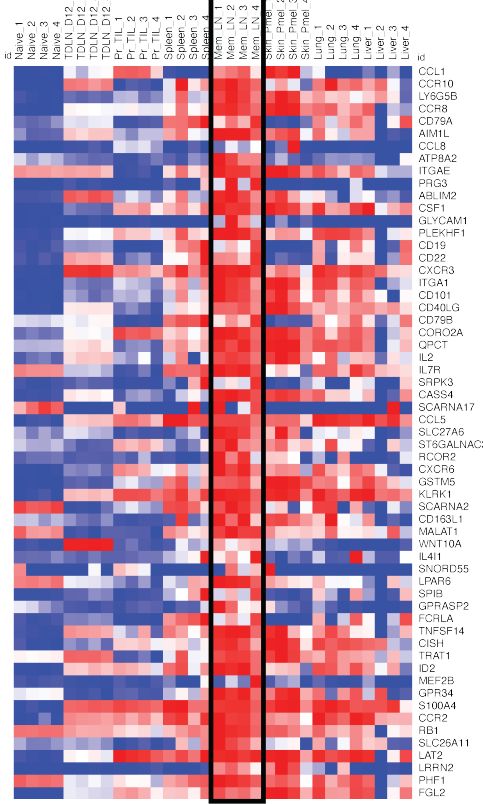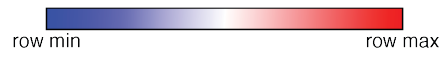

**Figure S3. Tissue transcriptional signatures define tumor-specific CD8 T cells in peripheral tissues, Related to Figure 1.** Mice were treated to induce MAV as in Fig. 1A. Thy1.1+ pmel cells were isolated by FACS from RLN and B16 tumors on day 12 (the day of tumor excision), and then from RLN, spleen, skin, lung, liver 45 days post-surgery. Gene expression was determined from FAC-sorted pmel cells (pooled from 5 mice/sample) by single end 75 bp full length poly-A RNA-sequencing, as described in schematic diagram in Figure 2A. Quadruplicate samples were analyzed from each tissue site, as indicated on the top of each row. Genes with a weight of 0.3 and higher (in each tissue relative to other tissues; see STAR Methods) were determined to be tissue specific and are shown above. Heatmaps were generated using browser-based software, Morpheus.

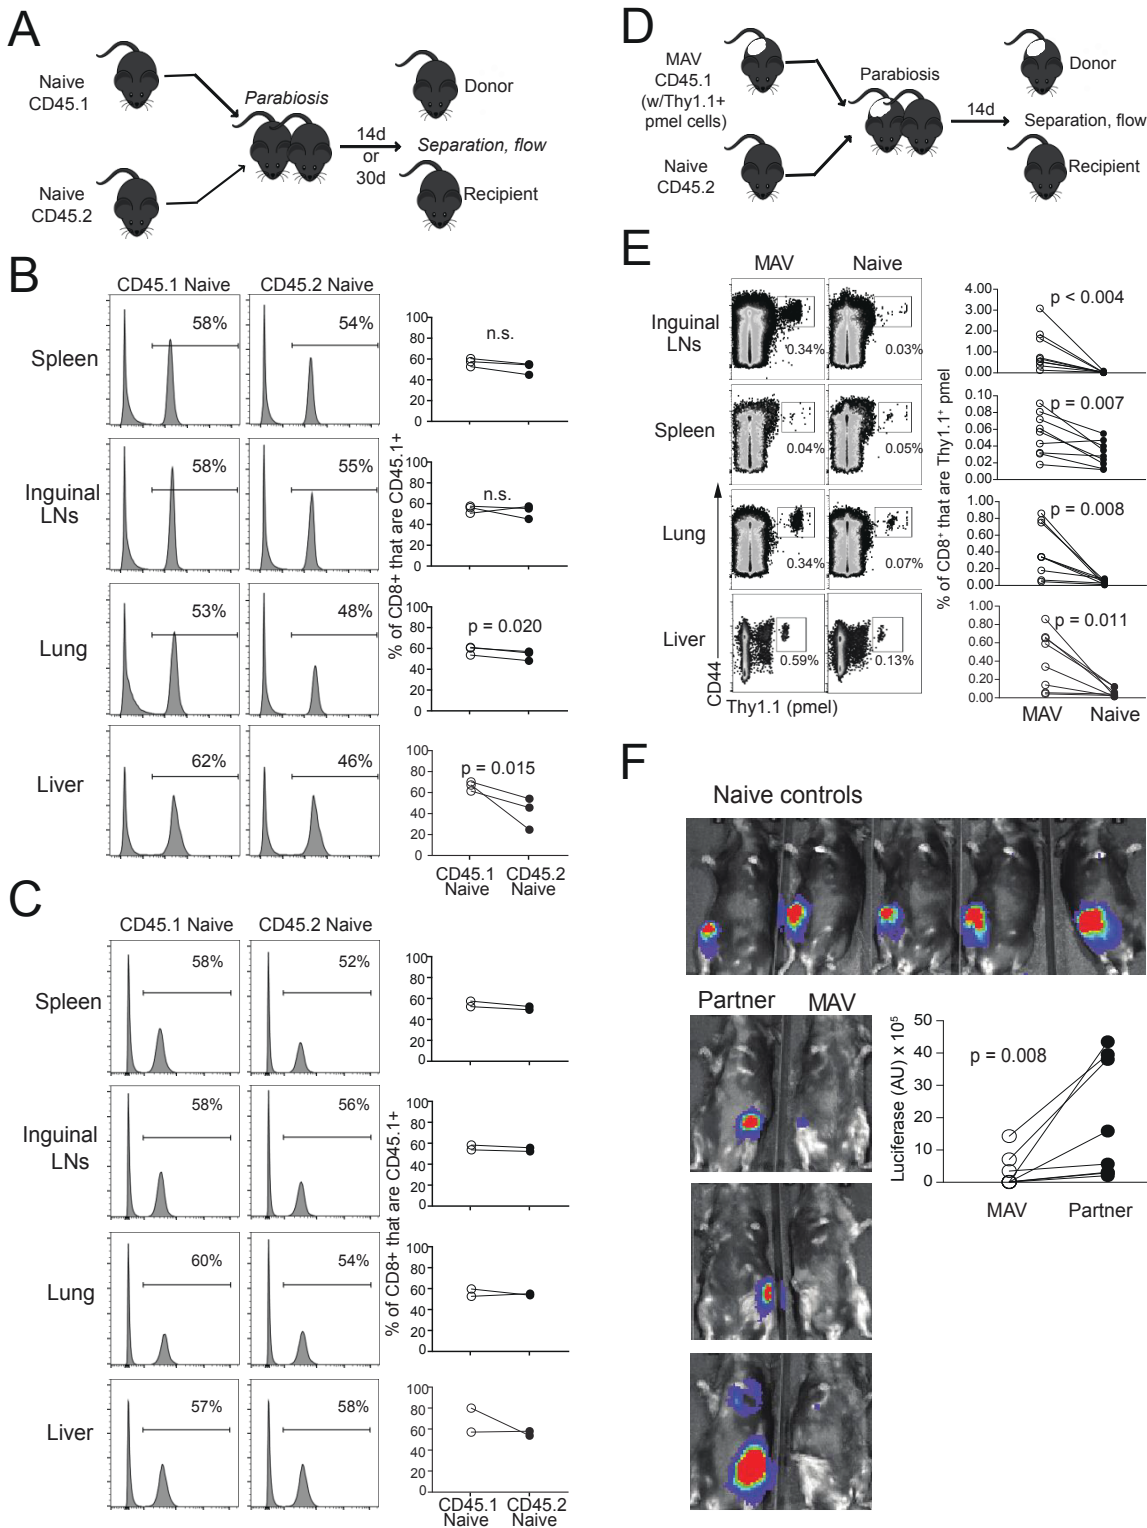

**Figure S4. Parabiosis immune equilibration controls, Related to Figures 2 and 6.** (A) Experimental schematic depicting the parabiosis surgery with naïve CD45.1 and CD45.2 C56BL/6 mice. Percent of CD8<sup>+</sup>CD45.1<sup>+</sup> cells was assessed in indicated tissues gated on CD8<sup>+</sup> cells either (B) 14 days or (C) 30 days post parabiotic surgery. (D) Experimental schematic depicting the parabiosis surgery for testing tumor-specific CD8 T cell residency with naïve recipient mice. (E) Distribution of Thy1.1<sup>+</sup> pmel cells (gated on CD8<sup>+</sup>) in indicated tissues. (F) Mice were treated as in Figure 6H and rechallenged with 5x10<sup>4</sup> B16-luciferase cells injected directly into regional LNs (RLN); LN tumor burden was imaged 7 days later. Symbols represent individual mice, with lines joining parabiotic partners. Significance was determined by paired *t* test or Wilcoxon matched pairs test; non-significant (n.s.) indicates  $p > 0.05$ . Data shown are from a single experiment (B and C), or pooled from two independent experiments (E and F).

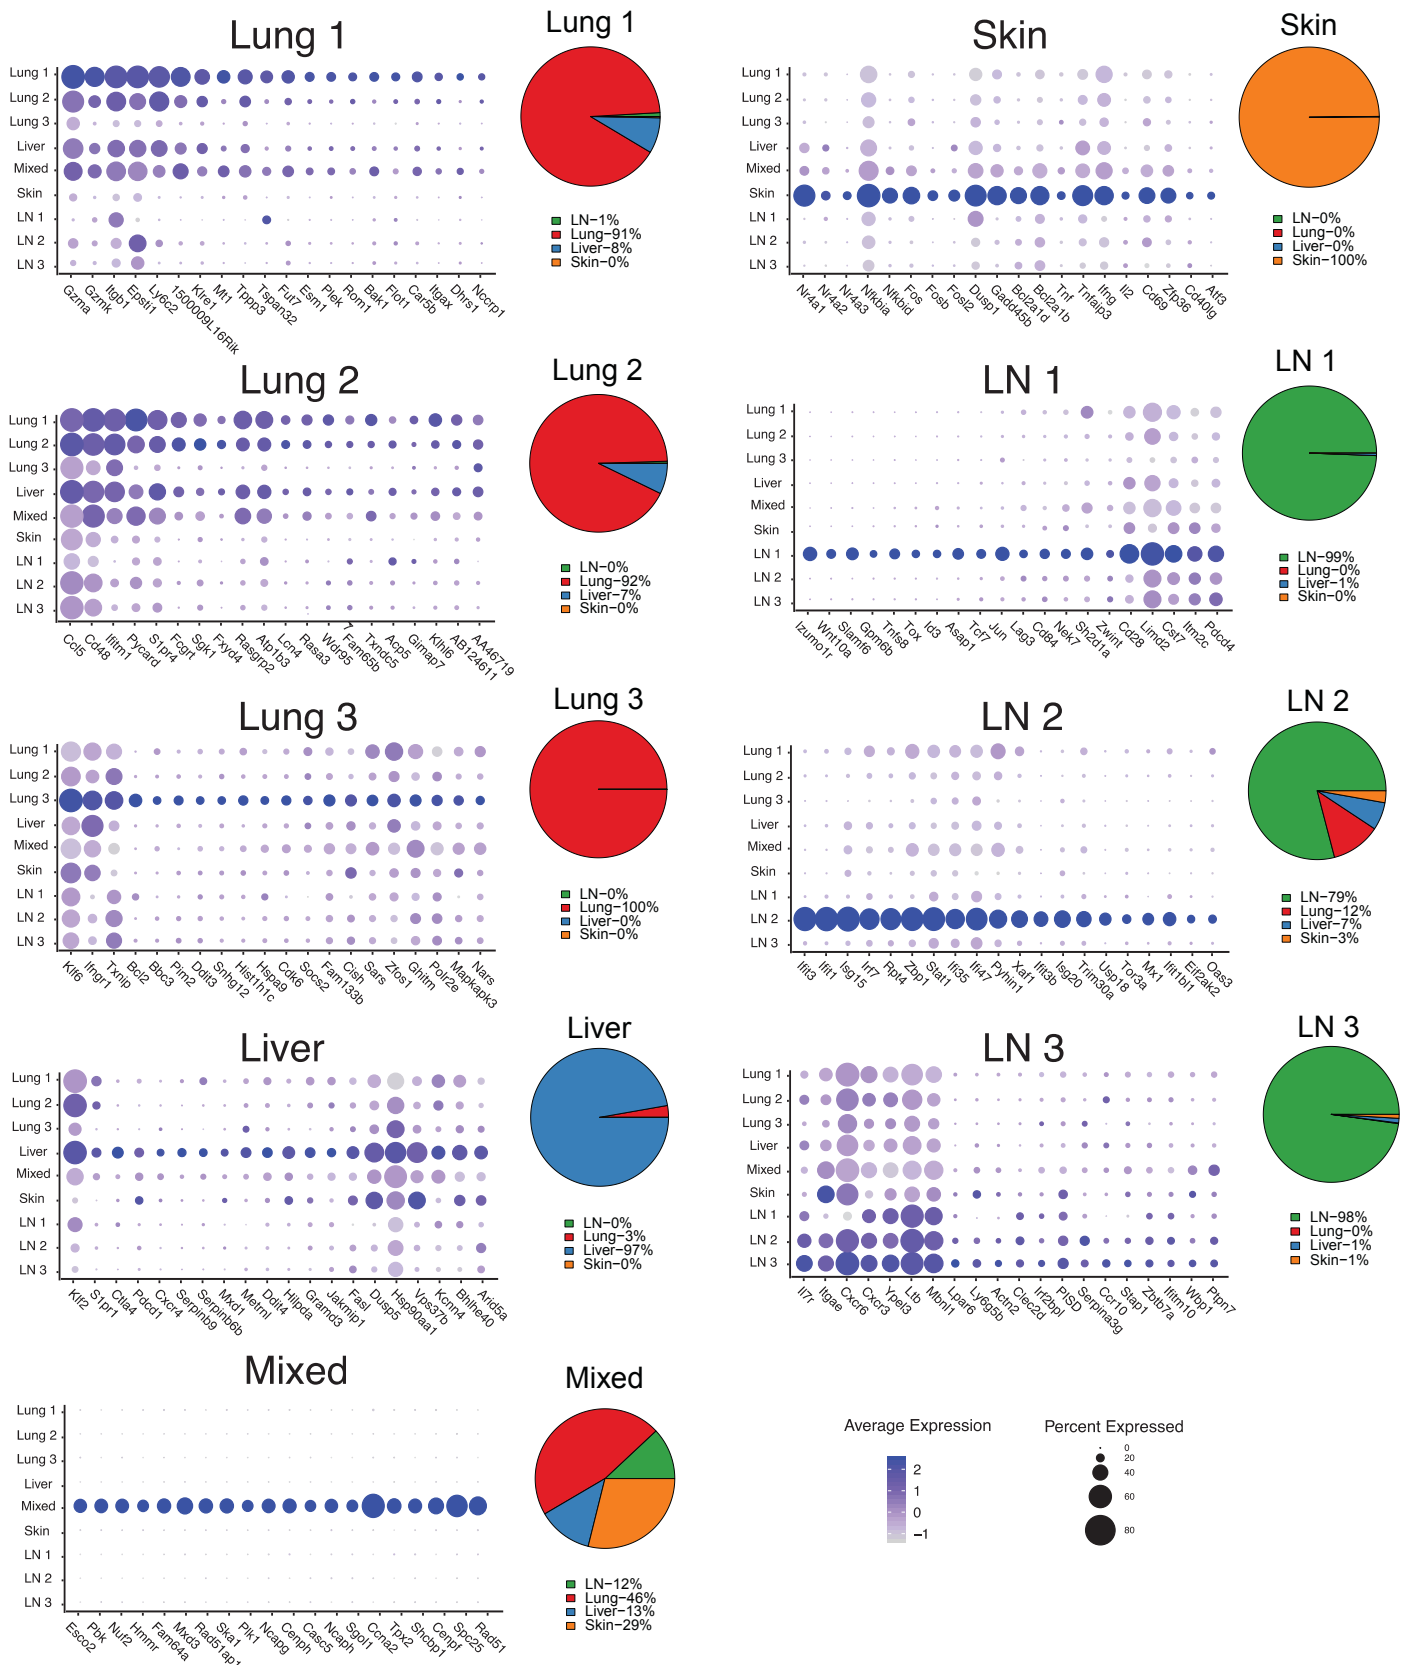

**Figure S5. Pmel T cell heterogeneity within each tissue is defined by unique gene expression patterns, Related to Figure 3.** As described in Figure 3, FAC-sorted pmel T cells underwent 3'-end single cell RNA-seq using the 10x Genomics platform. For each cluster in Figure 3, gene signatures comprised of the most significantly upregulated genes were defined by the *FindMarkers* build-in function in Seurat. Dot plots depict average Z-transformed normalized expression of the top 20 representative genes in each cluster. Pie charts depict the percentage of cells from each tissue that comprise each cluster.

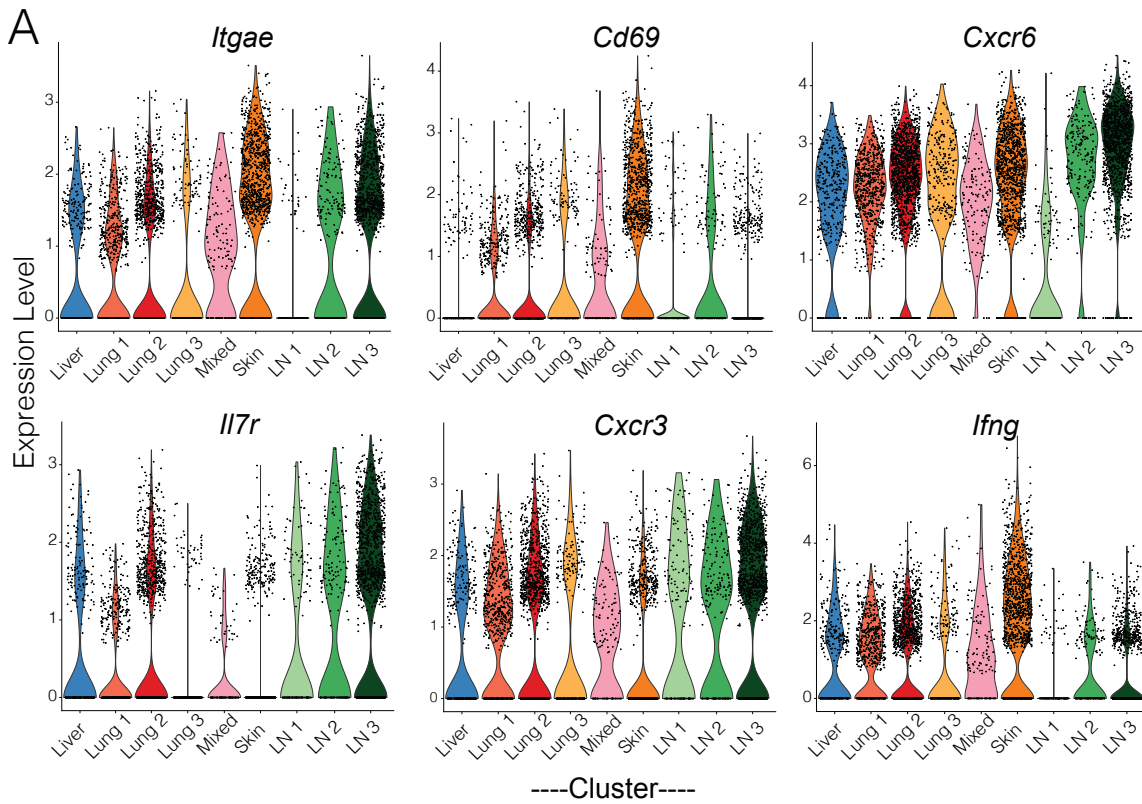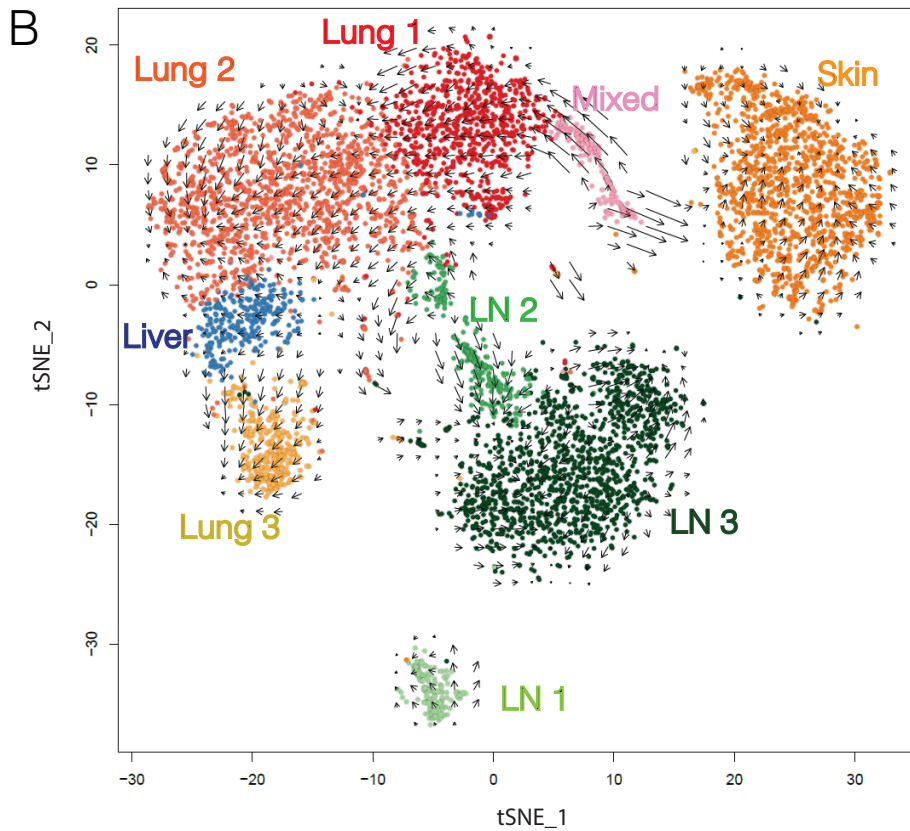

**Figure S6. Gene expression and RNA velocity analyses of single cell RNAseq data, Related to Figure 3. (A)** Violin plots depicting average Z-transformed normalized expression of select  $T_{RM}$  markers across clusters shown in Figure 3. **(B)** RNA velocity field projection onto the t-SNE plot of memory T cells shown in in Figure 3. Each dot corresponds to a single cell; arrows depict the local average velocity. Clustering was done using “pagoda2” with velocity estimations determined with “velocyto.R” R packages..

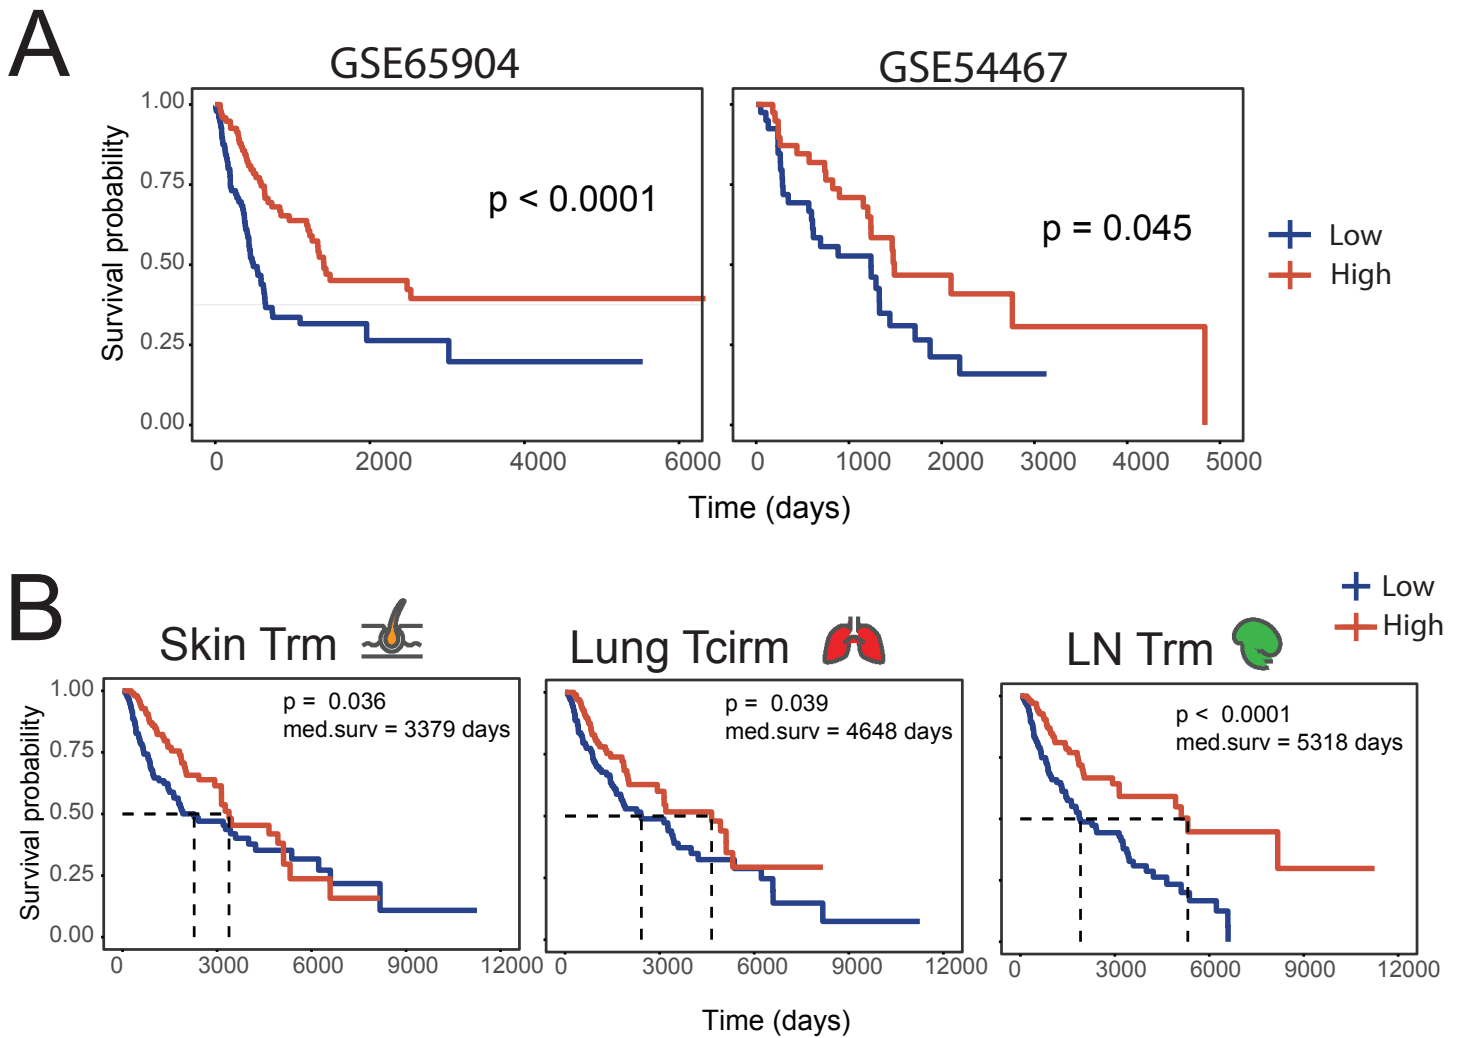

**Figure S7. The lymph node T<sub>RM</sub> gene signature is prognostic in patients with metastatic melanoma, Related to Figure 7.** The LN T<sub>RM</sub> gene signature was generated as described in Figure 7G. (A) Kaplan-Meier plots indicating the prognostic value of stratification based on enrichment of single cell-derived binary LN Trm T cell signatures in regional lymph node metastases for public datasets GSE53118 containing 79 patients, and GSE65904 containing 195 patients. (B) Survival analyses were conducted using TCGA regional LN metastatic specimens, as described in Figure 7H, but with CD8 T cell specific genes (*Cd8a*, *Cd8b1*, *Cd3g*, *Cd3e*, and *Trav7-4*) not added to the signatures. In all analyses, patients were divided into high vs. low enrichment groups based on separation at the median.



**Table S1, Related to Figure 3: Comparison of marker expression on pmel cells across methods and tissues**

| Tissue     | Method         | CD103/ <i>Itgae</i> | CD62L/ <i>Sell</i> | CD69      | CXCR6                           | CD127 | CXCR3 |
|------------|----------------|---------------------|--------------------|-----------|---------------------------------|-------|-------|
| Lymph Node | Protein (Flow) | High                | Low                | High      | Very High                       | High  | High  |
|            | Bulk RNA       | High                | Low                | Intermed  | Very High                       | High  | High  |
|            | scRNA          | High                | Absent             | Intermed  | Very High                       | High  | High  |
| Skin       | Protein (Flow) | Very High           | Absent             | Very High | Protein expression not assessed |       |       |
|            | Bulk RNA       | High                | Absent             | High      |                                 |       |       |
|            | scRNA          | High                | Absent             | High      |                                 |       |       |
| Lung       | Protein (Flow) | Intermed            | Low                | Intermed  |                                 |       |       |
|            | Bulk RNA       | High                | Low                | Intermed  |                                 |       |       |
|            | scRNA          | Intermed            | Absent             | Intermed  |                                 |       |       |
| Liver      | Protein (Flow) | Intermed            | Low                | Intermed  |                                 |       |       |
|            | Bulk RNA       | Intermed            | Low                | Intermed  |                                 |       |       |
|            | scRNA          | Intermed            | Absent             | Intermed  |                                 |       |       |
| Spleen     | Protein (Flow) | Intermed            | Low                | Intermed  |                                 |       |       |
|            | Bulk RNA       | Intermed            | Intermed           | Low       |                                 |       |       |
| Naïve      | Protein (Flow) | Intermed            | High               | Low       |                                 |       |       |
|            | Bulk RNA       | Intermed            | High               | Low       |                                 |       |       |

Expression levels (Very High, High, Intermediate, Low, Absent) are described relative to the following pmel control populations:

|                | Positive | Negative     |
|----------------|----------|--------------|
| Flow cytometry | Skin     | Naïve        |
| Bulk RNA       | Skin     | Naïve & TILs |
| scRNA          | Skin     | None         |

**Supplemental Table 2, Related to Figure 7: Tissue specific transcriptional signatures**

| Skin_Trm   |          |          |         | Lung_Circm |          |         |           | LN_Trm   |          |
|------------|----------|----------|---------|------------|----------|---------|-----------|----------|----------|
| ACTB       | EMD      | JUND     | RGS2    | ABRACL     | ESD      | PDLIM1  | S100A10   | ACAP1    | LY6G5B   |
| AKAP13     | ENO1     | KDM6B    | RHEB    | ACTG1      | ESM1     | PDLIM2  | S100A11   | ACTN2    | MALAT1   |
| ALDOA      | ERDR1    | KLF10    | RORA    | AIMP1      | FLOT1    | PGLYRP1 | S100A4    | AMICA1   | MBNL1    |
| ANXA1      | ETS1     | KLF6     | RPL15   | ANXA2      | FUT7     | PHF5A   | S100A6    | ARHGEF1  | MRPL52   |
| ANXA2      | FASL     | LCP1     | RPL35   | ANXA6      | GAPDH    | PKP3    | S1PR4     | ATXN7L3B | MXD4     |
| ARID5A     | FGL2     | LDHA     | RRAD    | AP2S1      | GGT1     | PLEK    | SEC61B    | AW112010 | MYCBP2   |
| ATF3       | FKBP2    | LITAF    | RSRC2   | APRT       | GIMAP1   | PLP2    | SERPINB6A | B4GALNT1 | N4BP2L2  |
| ATP2B1     | FOS      | LMNA     | SAMSN1  | ARL6IP5    | GIMAP7   | POLR1D  | SERPINB6B | BCL11B   | NDUFA3   |
| AY036118   | FOSB     | LRRCS58  | SAP18   | ARPC1B     | GLIPR2   | PPP1CA  | SH2D1A    | CBX3     | NDUFA5   |
| B4GALT1    | FOSL2    | LY6G5B   | SAT1    | ARPC3      | GLRX     | PRDX1   | SIKE1     | CCND2    | NKTR     |
| BHLHE40    | FTH1     | MALAT1   | SERTAD1 | ARPC5      | GLTSCR2  | PRELID1 | SNRPE     | CCR10    | NUDCD3   |
| BRD2       | FTL1     | MIF      | SIT1    | ATP1B3     | GLUD1    | PRR13   | SRP19     | CD27     | OGT      |
| BTG1       | FUS      | MXD4     | SLBP    | ATP5C1     | GM2A     | PSMB4   | SSR3      | CD7      | PDCD4    |
| BTG2       | GADD45B  | MYH9     | SLC38A2 | ATP5F1     | GMFG     | PSMD8   | SURF1     | CD74     | PDIA3    |
| CALM1      | GAPDH    | NDFIP1   | SLC3A2  | BAK1       | GNA15    | PSME1   | TAGLN2    | CHD3     | PDIA6    |
| CALM2      | GCH1     | NEURL3   | SMAD7   | BC021614   | GNB2L1   | PYCARD  | TKTL1     | CIRBP    | PTPN7    |
| CAPG       | GEM      | NFKBIA   | SMCO4   | BSCL2      | GZMA     | PYHIN1  | TMSB4X    | CLEC2D   | PTPRC    |
| CAPNS1     | GM6133   | NFKBID   | SOCS1   | BTF3       | GZMB     | RAC2    | TOMM22    | CROT     | RAPGEF6  |
| CCDC107    | GNB1     | NFKBIZ   | SQSTM1  | CAR5B      | GZMK     | RACGAP1 | TPPP3     | CSF1     | RBPJ     |
| CCL4       | GPR132   | NR3C1    | SRSF2   | CARHSP1    | HMGB2    | RASA3   | TSPAN32   | CXCR3    | RGS10    |
| CCND2      | GSTP1    | NR4A1    | STK17B  | CCDC12     | ICT1     | RASGRP2 | TWF2      | CXCR6    | RPL15    |
| CD28       | H3F3B    | NR4A2    | TAGAP   | CCL5       | IFITM1   | RBM3    | TXN1      | EIF5     | RPL35    |
| CD40LG     | HERPUD1  | NR4A3    | TBX21   | CCR2       | IFITM2   | REEP5   | TXNDC5    | EVL      | RPL38    |
| CD44       | HILPDA   | ODC1     | TESC    | CCT2       | IFITM3   | RILPL2  | UQCRCF51  | FAM189B  | RPS28    |
| CD6        | HIVEP2   | ORA1     | TGFB1   | CD47       | IGBP1    | RNH1    | VIM       | FUBP1    | RPS29    |
| CD69       | HMG1     | PDCD1    | TGIF1   | CD48       | ITGAX    | ROM1    | WDR95     | FYB      | SASH3    |
| CD82       | HSD11B1  | PDIA3    | THY1    | CDC25B     | ITGB1    | RPL10   |           | GRAMD1A  | SEMA4A   |
| CDKN1A     | HSP90AB1 | PDIA6    | TMEM123 | CDC42      | KLHL6    | RPL10A  |           | GSTP1    | SHISA5   |
| CHD4       | HSP90B1  | PFN1     | TMEM256 | CLIC1      | KLRD1    | RPL22   |           | H2-T23   | SIPA1    |
| CISH       | HSPA5    | PHLDA1   | TNFAIP3 | CLTA       | KLRE1    | RPL24   |           | HMG1     | SLFN2    |
| CITED2     | HSPA8    | PIM1     | TNFAIP8 | CMTM7      | KXD1     | RPL28   |           | HMHA1    | SP100    |
| CLK1       | ICAM1    | PKM      | TOB1    | CORO1A     | LAT2     | RPL29   |           | HSP90B1  | SPCS2    |
| COQ10B     | ICOS     | PLD3     | TOMM6   | CORO1B     | LGALS1   | RPL31   |           | ID2      | SRRM2    |
| COTL1      | IER2     | PNRC1    | TUBA4A  | COX4I1     | LGALS3   | RPL39   |           | IFITM10  | STAP1    |
| CREM       | IER5     | POLR2L   | UBA52   | COX5B      | LGALS3BP | RPL4    |           | IKZF3    | TBC1D10C |
| CSRNP1     | IFNAR1   | PPP1R11  | UBC     | CRIP1      | LSP1     | RPL7    |           | IL16     | TESC     |
| CTLA2A     | IFNG     | PPP1R15A | UBE2S   | CSNK2B     | MRPL30   | RPL7A   |           | IL18R1   | TNFAIP8  |
| CTSW       | IFNGR1   | PPP1R16B | USMG5   | CTLA2B     | MRPS16   | RPLP0   |           | IL7R     | TNRC6A   |
| D16ERTD472 | IFRD1    | PRDX6    | USP50   | DAP        | MS4A6B   | RPS10   |           | IRF2BPL  | TSC22D4  |
| DNAJA1     | IL2      | PRKAR1A  | VGLL4   | DHRS1      | MSRB1    | RPS11   |           | ITGAE    | UBA52    |
| DNAJB1     | IL21R    | PRR7     | VPS37B  | EBP        | MT1      | RPS12   |           | ITGAL    | UCP2     |
| DUSP1      | IL2RB    | PTMA     | WBP1    | EEF1B2     | MYL6     | RPS17   |           | ITM2C    | WBP1     |
| DUSP5      | IL2RG    | PTP4A1   | WNK1    | EEF2       | MYO1G    | RPS2    |           | LFNG     | XIST     |
| DYNLL1     | ITGAE    | PTPN22   | WSB1    | EIF3F      | NACA     | RPS20   |           | LPAR6    | YPEL3    |
| EIF1       | ITK      | QPCT     | YBX1    | EIF3H      | NCCRP1   | RPS26   |           | LRRCS58  | ZBTB7A   |
| EIF4A1     | ITM2B    | RAPGEF6  | YWHAZ   | EIF3I      | NPC2     | RPS27L  |           | LTB      | ZNRF1    |
| EIF5A      | ITPKB    | RGCC     | ZC3H12A | EIF4E2     | NRP1     | RPS4X   |           | LY6A     |          |
| EMC10      | JUNB     | RGS1     | ZFP36   | EPST11     | NUDT21   | RPSA    |           | LY6E     |          |
|            |          |          | ZFP36L1 |            |          |         |           |          |          |
|            |          |          | ZFP36L2 |            |          |         |           |          |          |
|            |          |          | ZNRF1   |            |          |         |           |          |          |

**Supplemental Table 3, Related to Figure 7: Patient Characteristics**

| Patient study identifier | Age | Sex | Treatment                                      | Lymph node metastasis type                   | Tumor size in LN | Experiment                                                   | Data shown in |
|--------------------------|-----|-----|------------------------------------------------|----------------------------------------------|------------------|--------------------------------------------------------------|---------------|
| sd-07-12291B2            | 58  | M   | Surgery                                        | sentinel                                     | 4.6mm            | IHC                                                          | Fig. 7A       |
| sd-08-11049F1            | 57  | F   | Surgery                                        | sentinel                                     | 2.6mm            | IHC                                                          | not shown     |
| sd-09-24757B1            | 54  | F   | Surgery                                        | sentinel                                     | 2.9mm            | IHC                                                          | not shown     |
| sd-08-26200C1            | 56  | M   | Surgery                                        | sentinel                                     | 2.2mm            | IHC                                                          | not shown     |
| D16002-652               | 87  | F   | 11 cycles of pembrolizumab followed by surgery | regional to abdominal oligometastatic lesion | grossly positive | Immunofluorescence                                           | Fig. 7B       |
| D16002-649               | 72  | M   | 2 cycles of pembrolizumab followed by surgery  | regional to lung oligometastatic lesion      | grossly positive | single cell RNA/TCR-seq (Figure 7C-F) and Immunofluorescence | Fig. 7C-F     |
